# Supplementary material for: Health-economic outcomes in hospital patients with medical-psychiatric comorbidity: A systematic review and meta-analysis
Source: PLoS One. 2018 Mar 13;13(3):e0194029. doi: 10.1371/journal.pone.0194029 (PMC5849295; doi:10.1371/journal.pone.0194029)
Supplement: S3 Table — (XLSX) [file pone.0194029.s003.xlsx]

## Sheet: Final selection
Artikelnummer	Auteur	Titel	Jaar	Design	Kenmerken populatie (N, age, sex, etc.)	Somatische diagnose Jeroen	Somatisch diagnose Luc	Psychiatrische diagnose Jeroen	Psychiatrische diagnose Luc	Controle groep Jeroen	Controle groep Luc	Wanneer zijn uitkomsten gemeten (tijdens opname, na opname)	LOS JEROEN	LOS LUC	Cost JEROEN	Cost Luc	Heropname Jeroen	Heropname Luc	Other remarks	Is medisch psychiatrische comorbiditeit het onderwerp?	Zijn de patienten inpatients geweest en wordt er tijdens of daarna gemeten?	Gecorrigeerd voor confounders?	Opmerking	Extra artikelen in literatuur	GRADE
198	Mai	The impact of mental illness on potentially preventable hospitalisations: a population-based cohort study	2011	Population-based retrospective cohort study	139,208 Mental Health Clients and 294,180 matched non-MHCs; Age, years, mean (SD) 43.7 (18.6) 45.1 (19.7) Sex, % male 40.3% 40.4%	most common PPH medical conditions in MHCs were diabetes and its complications, ADEs, chronic obstructive and its complications, ADEs, chronic obstructive pulmonary disease (COPD), convulsions and epilepsy, pulmonary disease (COPD), convulsions and epilepsy, and congestive heart failure. and congestive heart failure.	most common PPH medical conditions in MHCs were diabetes and its complications, ADEs, chronic obstructive and its complications, ADEs, chronic obstructive pulmonary disease (COPD), convulsions and epilepsy, pulmonary disease (COPD), convulsions and epilepsy, and congestive heart failure. and congestive heart failure.	Alcohol/drug disorders 8.0% -Schizophrenia 4.2% -Affective psychoses 17.1% -Other psychoses 6.7% -Neurotic disorders 16.2% -Personality disorders 2.5% -Personality disorders 2.5% -Adjustment disorders 7.3% -Depressive disorders 4.4% -Other mental disorders 8.0% -In MHR but had no mental health diagnosis, including suicide attempts 25.5%	Alcohol/drug disorders 8.0% -Schizophrenia 4.2% -Affective psychoses 17.1% -Other psychoses 6.7% -Neurotic disorders 16.2% -Personality disorders 2.5% -Personality disorders 2.5% -Adjustment disorders 7.3% -Depressive disorders 4.4% -Other mental disorders 8.0% -In MHR but had no mental health diagnosis, including suicide attempts 25.5%	non mental health clients	Ja, controle groep zijn non-mental health clients	na opname	Hospital discharges, bed days and average length of stay for potentially preventable hospitalisations by study cohort, PPH category and condition, 1 January 1990 to 30 June 2006 PPH category/condition Discharges in MHCs (n = 139,208) Discharges in Non-MHC (n = 294,180) Bed-days in MHCs (n = 139,208) Bed-days in Non-MHC (n = 294,180) ALOS (days) in MHCs (n = 139,208) ALOS (days) in Non-MHC (n = 29…	Tabel 2 geeft van vaccine-preventable, chronic en acute medische aandoeningen wat de gemiddelde LOS is voor patienten met en zonder mental health	x	X	x	X	0	Ja	Ja	0	0	GEEN RELEVANTE ARTIKELEN
282	Smith	Delirium affects length of hospital stay after lung transplantation	2014	cohort study	n=63; age 52.7 (16.8); 23 (37%) of 63 patients developed delirium; male 23 (35%)	The primary native disease of the lung transplantation patients was idiopathic pulmonary fibrosis (IPF) (37%), followed by chronic obstructive pulmonary disease (COPD) (22%), and CF (17%).	lung transplantation	delirium	CF, COPD, IPF, other (table 1)	no delirium	Yes, N=40 non-delirious	after transplantation	Length of hospitalization ranged from6 to 138 days (median, 17; interquartile range, 14). The presence of delirium (P = .006), greater POMS (P = .012), non-CF native disease (P = .005), and younger age (P = .009) were associated with longer duration of hospitalization. In contrast, the Charlson comorbidity index (P = .708) and LAS (P = .184) were not predictive of hospital duration. Similarly, pr…	lengh of hospitalization ranged from 6 to 138 days. The presence of delirium(P0,006) was associated with longer duration of hospitalization.	0	X	0	X	0	0	0	0	0	GEEN RELEVANTE ARTIKELEN
391	Erdur	Somatic comorbidity in anorexia nervosa: First results of a 21-year follow-up study on female inpatients	2012	retrospective	N=169 females with anorexia nervosa	Somatic comorbidity at T0 was present in N = 41 patients (24.3%). N = 13 patients (7.7%) showed somatic comorbidities related to anorexia nervosa, predominantly internal diseases (n = 9). N = 26 patients (15.4%), showed somatic comorbidities independent of anorexia nervosa, also most frequently in the field of internal medicine (n = 9). N = 2 patients showed somatic complications related to other…	Table 1, internal medcine, dentistry, orthopaedy, dermatology, gynaexology, haematology, neurology, surgery.	anorexia nervosa	anorexia nervosa	anorexia nervosa patients without somatic comorbidity	Yes, without somatic comorbidity (128N)	na opname	LOS 66,6±50,3 in AN patients with somatic comorbidity and 50,0±47,0 in An patients without somatic comorbidity (P=0.05)	duration of treatment anorexia nervosa with somatic comorbidity 66,6(50,3) AN without somatic comorbidity 50(47) P=0,05	x	LOS or possible proxy for costs therefor maybe also here duration of treatment anorexia nervosa with somatic comorbidity 66,6(50,3) AN without somatic comorbidity 50(47) P=0,05	x	X	0	ja	ja	tabel 2, lijkt niet te zijn gecorrigeerd voor confounders	0	GEEN RELEVANTE ARTIKELEN
405	Wancata	Does psychiatric comorbidity increase the length of stay in general hospitals?	2001	naturalistic cohort study	n=821; male 29%; 41.3%>=65 years-of-age	Diseases of the circulatory system and diseases of digestive and genitourinary system were the most frequent somatic conditions.	Diseases of the circulatory system and diseases of digestive and genitourinary system were the most frequent somatic conditions.	The most frequent psychiatric disorders were dementia (11.6%), minor depression (7.9%) and substance abuse disorders (5.8%). Of all psychiatric cases, 6.2% received more than one psychiatric diagnosis.	The most frequent psychiatric disorders were dementia (11.6%), minor depression (7.9%) and substance abuse disorders (5.8%). Of all psychiatric cases, 6.2% received more than one psychiatric diagnosis.	0	0	na opname	The mean LOS for all hospital departments was 13.5 days (standard deviation 5 9.9; median 5 10.0). Presence of a psychiatric disorder according to CIS case criteria, a higher number of somatic diagnoses, higher age, and the number of nonpsychiatric hospital admissions during the last year turned out to be predictors for a longer LOS. A diagnosis of neoplasms was associated with a shorter LOS. Sex…	The mean LOS for all hospital departments was 13.5 days (standard deviation 5 9.9; median 5 10.0). Presence of a psychiatric disorder according to CIS case criteria, a higher number of somatic diagnoses, higher age, and the number of nonpsychiatric hospital admissions during the last year turned out to be predictors for a longer LOS. A diagnosis of neoplasms was associated with a shorter LOS. Sex…	x	x	x	x	0	ja	ja	Ja, zij claimen tot dan (2001) het eerste Europese onderzoek te zijn dat confouncing factors echt meetelt	0	8 titels mogelijk relevant (5 aanwezig 3 niet): Fulop 1987, Saravay 1994, 1996, 1991 aanwezig, Ackerman 1988 aanwezig. Incalzi 1992 niet aanwezig, johnston 1987 niet aanwezig, Levenson 1990 niet aanwezig
423	Furlanetto	The impact of psychiatric comorbidity on length of stay of medical inpatients	2003	prospective	N=317 medical inpatients; Subjects (N 317) were predominantly male (65%), white (93%), married (67%). The age ranged from 18 to 64 years; being 70% 65 years old and the majority had less than 5 years of education (53%).	Cardiovascular 50 (16.8) - Gastrointestinal 55 (17.4) - Neoplasms 37 (11.7) - Pulmonary 35 (11) - Infectious 38 (12) - Other 102 (32.2)	Table 1: reasons for hospitalization: cardiovascular, gastrointestinal, neoplasms, pulmonary, infectious,	Any psychiatric comorbidity 156 49.2 - Cognitive impairment† 64 20.2 - Depressive disorders 52 16.4 - Substance related disorders 33 10.4 - Adjustment disorders 14 4.4 - Anxiety disorders 6 1.9	156 had psychiatric comorbidity, table 2) Cognitive imparment, depressive disorders, substance realted disorders, adjustment disorders, anxiety disorders	0	No psychaitric comorbidity	Na opname	Length of Stay, days All 13.3+/-12 No psychiatry 12.1+/-9.9 With psychiatry 14.7+/-13.8 P=0.05	Los no psychiatric comoribidty LOS 12,1 (9,9),psychiatric comorbidity LOS 14,7(13,8) P = 0,05, controlled for age and physical severit cognitive impairment is the only psychhiatric disorder with significant increased LOS.alle andere onderzochte pyshciatrische aandoeningen lijken niet significant de LOS te verlengen.	x	X	x	X	0	Ja	Ja	Ja, in de analyse zijn confounders meegenomen	0	13 titels mogelijk relevant (8 aanwezig 5 niet). Fulop 1987 aanwezig, Fulop 1989 aanwezig, Saravay 1991 aanwezig, Saravay 1994 aanwezig, Stevens 1998 aanwezig, Koenig 1998 aanwezig, Fulop 1998 aanwezig, Wancata 2001 aanwezig. Niet aanwezig: Lyons 1986, Levenson 1986, 1990, Morris 1990, Verbosky 1993..
445	Sloan	A Five-Year Study on the Interactive Effects of Depression and Physical Illness on Psychiatric Unit Length of Stay	1999	naturalistic cohort study in psychiatric hospitalized patients	n=2323 psychiatric admissions; during period of 5 years ; age 37.5 (14.2 SD); male 39%	Physical illnesses were limited to those appearing in the International Classified of Diseases-9 (ICD 9), thus including both major disorders and minor disorders such as allergic rhinitis.	Zie afkortingen in table 2	Psychiatric disorder categories were as follows: 1) psychoses, 2) depressions, 3) personality disorders, 4) anxiety disorders, 5) adjustment disorders, not depressed, 6) bipolar disorders, not depressed, and 7) other disorders (eg, eating disorders, substance abuse/dependency, etc.).	Psychosis, depression, personality disorder, anxiety disorder, adjusment disorder, bipolar disorder, other disorders	no comorbid somatic disorder	no comorbid somatic disorder	tijdens opname	Average length of stay was significantly longer for patients with comorbid physical diagnoses (mean 5 20.01 days) than for patients with no physical diagnoses (mean 5 16.63 days). Analyses of the psychiatric categories revealed that the average length of stay for depressed patients was significantly greater for those with comorbid physical diagnoses (mean 5 19.73 days) than for depressed patients…	Average length of stay was significantly longer for patients with comorbid physical diagnoses (mean 5 20.01 days) than for patients with no physical diagnoses (mean 5 16.63 days). Analyses of the psychiatric categories revealed that the average length of stay for depressed patients was significantly greater for those with comorbid physical diagnoses (mean 5 19.73 days) than for depressed patients…	x	0	x	0	0	0	0	severity of physical illness is not examined in this study	0	5 mogelijk interessant 3 aanwezig. Saravay 1994 aanwezig, Fulop 1987 aanwezig, Schubert 1995 aanwezig, Lyons 1988 niet aanwezig, Schubert 1992 niet aanwezig
504	Chang	Predictor of readmissions on a Medical-Psychiatric unit among patients with minor mental disorders	2001	retrospective	n=164 admissed to a 'stress ward'	digestive disease most frequent (17,7%) followed by cardiovascular disease (15,2%)	digestive disease most frequent (17,7%) followed by cardiovascular disease (15,2%)	patients with readmission	patients with readmission	non readmission	non readmission	na opname	x	x	x	x	readmission rate was 17,7%; low GAF score, age under 40 years, previous psychiatric admissions and alcohol dpendence/abuse were significantly more present in readmitted vs non-readmitted patients	readmission rate was 17,7%; low GAF score, age under 40 years, previous psychiatric admissions and alcohol dpendence/abuse were significantly more present in readmitted vs non-readmitted patients	x	x	0	0	0
638	Johansen	Acute care hospital hospital days and mental diagnosis	2012	register-based case-control study	n=2069690 admissions in acute care hospitals	0	Disease types see table 2	patients with mental illness (most: organic [delirium/dementia], mood disorders and schizophrenia)	0	no mental illness	0	0	Average LOS was 16.0 in patients with mental illness vs 5.7 days without mental illness (more than 2,5 times longer in mental illness than not); for all age categories the same pattern	Mental diagnoses, whether most responsible or comorbid, were associated with much longer hospital stays overal, more than two and a half times as lng than stays not involving a metnal diagnosis. Table 2 shows LOS for somatic disease and comorbid disorder	x	X	x	X	0	Ja	Ja	only age and primary diagnosis	conclusie mogelijk gebruiken in introductie	GEEN RELEVANTE ARTIKELEN
655	Ceilley	Prevalence and Impact of Medical Disorders in Hospitalized Psychiatric Patients with Comorbid Substance Use Disorders	2005	cross-sectional study	87 patients with comorbid psychiatric and substance use disorders; age ranged from 19 to 57 (mean = 37.6, SD 69.2 years, median = 39 years). Fifty-fiveparticipants were Caucasian (63%), 31 wereAfrican-American (36%), and 1 subject was Hispanic. Fifty-eight subjects (67%) were male, and 55 subjects (63%) were single and never married. Thirty subjects (35%) had not graduated from high school or obt…	Osteoarthritis was the most commonly reported medical condition, followed by viral hepatitis C infection, chronic obstructive pulmonary disease (COPD), gastroesophageal reflux disease (GERD), and hypertension. Six subjects reported no active medical conditions, 27 subjects reported 1 disorder, 27 reported 2 disorders, 12 reported 3 disorders, and 15 reported having 4 or more disorders (mean = 2.2…	Osteoarthritis was the most commonly reported medical condition, followed by viral hepatitis C infection, chronic obstructive pulmonary disease (COPD), gastroesophageal reflux disease (GERD), and hypertension. Six subjects reported no active medical conditions, 27 subjects reported 1 disorder, 27 reported 2 disorders, 12 reported 3 disorders, and 15 reported having 4 or more disorders (mean = 2.2…	The most common primary psychiatric diagnoses upon discharge were depressive disorders (68%), bipolar disorders (19%), and psychotic disorders (12%).	The most common primary psychiatric diagnoses upon discharge were depressive disorders (68%), bipolar disorders (19%), and psychotic disorders (12%).	0	0	na opname	Patients treated with at least 1 somatic medication (N = 55) had significantly longer stays in the psychiatric hospital (mean = 12.3, SD 5.2 vs. mean = 9.1, SD 3.7; t = 3.1, df = 85, P = 0.003). Linear regression analysis revealed that the length of stay in the psychiatric hospital was also associatedwith age and total number of prescribed somatic medication (B=0.1, t = 2.0, P<0.05 for age;B = 0.…	Patients treated with at least 1 somatic medication (N = 55) had significantly longer stays in the psychiatric hospital (mean = 12.3, SD 5.2 vs. mean = 9.1, SD 3.7; t = 3.1, df = 85, P = 0.003). Linear regression analysis revealed that the length of stay in the psychiatric hospital was also associatedwith age and total number of prescribed somatic medication (B=0.1, t = 2.0, P<0.05 for age;B = 0.…	x	x	x	x	LOS=psychiatric hospitalisation!	ja	ja	0	0	1 relevant artikel, is aanwezig
669	Boustani	Impact and Recognition of Cognitive Impairment Among Hospitalized Elders	2010	Observational cohort study.	997 patients age 65 and older admitted to medical services; Age (years), mean (SD) 74.8 (7.5); Female (%) 67.8 - African American (%) 59.4; Education (years), mean (SD) 10.3 (2.8)	0	0	424 patients (43%) were cognitively impaired; Among elders with CI, 163 (38%) had at least one day of delirium during their hospital course.	424 patients (43%) were cognitively impaired; Among elders with CI, 163 (38%) had at least one day of delirium during their hospital course.	no delirium	no delirium	na opname	Patients with delirium stayed longer in the hospital (9.2 days vs. 5.9, P < 0.001)	Patients with delirium stayed longer in the hospital (9.2 days vs. 5.9, P < 0.001)	x	x	Readmission within 30 days after discharge home (%) with delirium 22.5 without delirium 17.8 P=0.50	Readmission within 30 days after discharge home (%) with delirium 22.5 without delirium 17.8 P=0.50	0	ja	ja	ja, after adjusting for age, gender, race comorbidity and cognitive function at screening	0	6 mogelijk interessant 4 aanwezig 2 niet, lyketsos, fulop, saravay 1994, 1991 wel, Saravay 2004 niet en Johnston 1987 niet
707	Fulop	Impact of Psychiatric Comorbidity on Length of Hosiptal stay for medical/surgical patients: a preliminairy report	1987	retrospective, cohort study	n=37,370 hospitalized NYC patients; n=21,889 hospitalized Chicago patients	0	0	psychiatric disorder; 24% organic mental disorder (delirium, substance abuse)	psychiatric disorder; 24% organic mental disorder (delirium, substance abuse) table 3	no psychiatric disorder	no psychiatric disorder	na opname	LOS higher in psychiatric comorbidity: 19.8 ± 33.3 versus 9.2±15.3 in NYC; 13.7±27.7 versus 8.3±13.2 in Chicago	Mount sinai hospital: psychatric comorbidity 19.8 (33.3), memorial hospital 13,7 (27,7) no psychiatric comorbidity 9,2 (15,3) and 8,3 (13,2)	0	0	0	0	0	0	0	0	0	1 niet aanwezig Lyons 1986
775	Borckardt	Excess Health Care Service Utilization and Costs Associated With Underrecognition of Psychiatric Comorbidity in a Medical/Surgical Inpatient Setting	2011	billing database examination, retrospective	10 716 nonpsychiatric inpatients compared with the 149 inpatient medical/surgical patients that were also seen in outpatient psychiatric clinics.	0	Non specific, all were medical inpatietns	patients receiving outpatient psychiatric treatment	outpatient psychiatric visit or inpatient psychiatry consultation	patients without identified psychiatric problems	non outpatinet psychiatry visits	during and afeter	The average length of stay (LOS) for inpatients without outpatient psychiatry visits was 5.85 whereas inpatient LOS among patients involved in outpatient psychiatry was 5.78 (t10 ,863 = 0.11, not significant).	LOS was not significant longer between patients with and without outpatient psychiatry visit. Patients that had a inpatinet psychiatry consultation had a LOS of 9,39 patient without a consultation had a mean LOS of 4,63 this was a significant difference P<0,0001	There was no difference in total costs associated with medical/surgical hospitalizations between the 2 groups (nonpsychiatry mean cost = $14 401.73; mean inpatient medical cost of psychiatric outpatients = $13 394 39; t4381 = 0.41, not significant).	Cost werent different between patients with and without outpatient psychiatry visit, however they are significantly different for patients receiving inpatient psychiatry consultation and without 25772,76 dollar vs. 9672,16 dollar P <0,0001	Patients identified as having outpatient psychiatry involvement had significantly more medical/surgical hospitalizations on average (mean = 1.60) than nonpsychiatric patients (mean = 1.34) during the 6-month study period (t4381 = 2.94, P = .003).	number of hospitalizatoins was significatnly different between patients without and with outpatinet psychiatry visit, 1,6 vs 1,34 P 0,003	Of the 149 patients, 36 (24%) had a psychiatry consultation during their inpatient stay. Those that had a psychiatry consultation had a significantly higher LOS than those without (mean LOS for patients with a psychiatry consultation 9.39; nonconsultation mean LOS=4.63, t147 = 3.73, P < .0001). Furthermore, mean total costs for those receiving a consultation ($25 772.76) were significantly higher…	ja	ja	nee, niet gekeken naar zwaarte van bijvoorbeeld somatische en psychiatrische ziektes	0	GEEN RELEVANTE ARTIKELEN
835	Davydow	The Association of Comorbid Depression with Intensive Care Unit Admission in Patients with Diabetes: A Prospective Cohort Study	2011	prospective cohort	3,596 patients with diabetes; Age 63.5 (13.1) - Female 1,740 (48.5%) - Married 2,328 (64.8%) - Non-White 675 (18.8%) - Education beyond high school 2,741 (76.3%)	diabetes	diabetes	depression	depression	no depression	no depression	na opname	Total hospital days over 3-year period No depression: 2.5 (6.7) Major depression: 4.9 (12.2) F=17.9; P<0.001	Total hospital days over 3-year period No depression: 2.5 (6.7) Major depression: 4.9 (12.2) F=17.9; P<0.001	x	X	x	X	In this prospective investigation of patients with diabetes, probable major depression at baseline was the single strongest factor associated with ICU hospitalization, as well as more days spent hospitalized, even after adjusting for baseline medical comorbidity and diabetic complication severity.	Ja	Ja	We then added three groups of potential confounding variables to the regression model, including demographic variables cliinicalvariables and wether or not the patient was taking insulin.	0	2 aanwezig, Saravay en Himelhoch, 2 niet aanwezig, Jiang en Sayers
884	Chwastiak	The Effect of Serious Mental Illness on the Risk of Rehospitalization Among Patients With Diabetes	2014	cohort study	82,060 adults in Washington state with diabetes mellitus;Male 40,364 51.0%; White 23,802 86.1%; Age (y) 65.4 +/- 14.8	All diabetes - Heart failure - Renal failure - Diabetes complicated - Hypertension complicated- Peripheral vascular	All diabetes - Heart failure - Renal failure - Diabetes complicated - Hypertension complicated- Peripheral vascular	severe mental illness: based on diagnosis codes indicating bipolar disorder (ICD9-CM296.0,296.01,296.04–296.08), schizophrenia (ICD9-CM295),and the psychotic disorders delusional disorder (ICD9-CM297),and non organic psychoses (ICD9-CM298)	bipolar disorder, schizoprhenia, psychotic diorders delusional disorder and nonorganic psychoses.	non severe mental illness	no serious mental illness	na opname	Reference group median 3 days IQR: 2–4 3 Severe psychiatry: median 3 days IQR: 2–4	Reference group median 3 days IQR: 2–4 3 Severe psychiatry: median 3 days IQR: 2–4	x	X	SMI rehospitalisations within 1 month after discherge: n=1820 n rehospitalisations: 281 (15.4%) of total admissions; OR 1.24; CI: 1.07–1.44; P=0.006	In the fully adjusted logistic regression model, a SMI diagnosis was independently associated with medical-surgical rehospitalization within the next month OR = 1,24 (1,07-1,44) p = 0,06.	0	ja	ja	After adjusting for demopgraphics, medical co-morbidity, and characteristics of the index hospitalization, co-morbid serious mental illness diagnosis was independently associated with increased…	0	GEEN RELEVANTE ARTIKELEN
886	Hochlehnert	Psychiatric comorbidity in cardiovascular inpatients:	2011	cohortstudy	N=1063; cardiovascular inpatients; The median age of all 1063 patients was 67 years (40% female)	Diseases of the circulatory system	cardiovasculaire disease	61 (37%) depressive disorders, 17 (10%) anxiety disorders, 10 (6%) somatoform disorders, 16 (10%) organic psychiatric disorders, 11 (7%) adjustment disorders, 26 (16%) substance dependence, 2 (1.2%) schizophrenic disorders, and 24 (15%) other diagnosis	61 depressive disorders, 17 anxiety disorders, 10 somatoform disorder, 16 organic psychaitric disorders, 11 adjustment disorders, 26 substance dependence, 2 schizophrenic, 24 other diosrers.	no psychiatric diagnosis	patients without psychiatric comorbidity	na opname	Duration of hospitalization (in days) With psychiatric comorbidity: 13.2 (0.7); without psychiatric comorbidity: 8.9 (0.3); effectsize: 0.56	patients with psychiatric comorbidity stayed significantly longer in the hospital compared to patients without psychiatric comorbidity (F1,1059 = 34,04; p<0,0001)	Cost (in euros) With psychiatric comorbidity: 7663 (571); Without psychiatric comorbidity: 5142 (210); effectsize 0.39	The average total costs of hospitalization for cardiovascular patients without psychaitric comrobdity and for patients with psychiatric comorbidity differed significantly (5142+/- 210 vs 7663+/-571 d=0,39	0	x	0	ja	ja	we compared patients with and without a psychiatric disoerd, controlling for sociodemogaphic characteristics.	0	2 aanwezig Saravay, 1994 & 1991, 1 niet aanwezig Friederich 2002
942	Shen	Co-occurring Mental Illness and Health Care Utilization and Expenditures in Adults with Obesity and Chronic Physical Illness	2008	cohort study	N=2440 adults; older than 21 years of age; Women 57.9%;White 70.4%; Married 59.2%; who had asthma, diabetes, heart disease, hypertension, or osteoarthritis	The chronic physical illnesses included were asthma (condition code 128), diabetes (condition codes 49, 50), heart disease (condition codes 96, 97, 100–111), hypertension (condition codes 98, 99), and osteoarthritis (condition code 203).	asthma, diabetes, heart disease, hypertension, osteoarthritis	Individuals with affective disorders (ICD-9-CM codes 296, 311, condition code 69); anxiety, somatoform,dissociative, personality disorders (condition code 72); or schizophrenia (ICD-9-CM code 295)	affective disoreders, anxiety, somatoform, dissociative, personality disorders and schizophrenia.	without mental illness	patients with physical illness without mental illness	na opname	x	x	Inpatients With mental illness: $ 2731; Without mental illness $2072	inpatients with mentall illness 2731 dollar inpatients without mental illness 2072 dollar non significant.	x	0	0	0	0	0	0	GEEN RELEVANTE ARTIKELEN
976	Douzenis	Factors affecting hospital stay in psychiatric patients: the role of active comorbidity	2012	cohort study; comparison of bipolar/schizophrenic patients with or without referrals for medical problems	Participants were aged from 18 to 65. 180 of them had Greek nationality and 36 were non-Greeks. 200 suffered from schizophrenia (92 men and 108 women) and 228 from bipolar disorder (78 men and 150 women).	Endocrine Circulatory Nervous Respiratory Musculoskeletal Blood Skin; respect. in schizophrenia: 24% 20% 3% 9% 2% 1% 5%; respect. In bipolar:13% 23.7% 4.4% 7% 1.7% 4.4% 7%	all	schizophrenia (n=200) and bipolar disorder (n=228)	Schizophrenia and bipolar patients	schizophrenic and bipolar patients without referrals to medical specialists	No referral	0	The median LOS for patients with bipolar disorder was 15 days (Mean 16.82 SD 8.758 N 228), significantly lower than the schizophrenia group U= 19828, p (2-tailed) = .020 r = −.11; In comparison with the control group (no referral)no other group had a significant difference in LOS except for the group with two referrals, a median of 5.5 days more.The median LOS for schizophrenia patients was 18 da…	Schizophrenic group: Overal, LOS was increased in all three cases (one referral, two, three or more) and the more the referrals the greater the increase in LOS. Bipolar Group: For these patients the increase in LOS was positively associated with increase in number of referrals but only when two referrals were carried out, in this case severe active comorbidity actually had a significant impact on…	x	X	x	X	0	Ja	Ja	Niet kunnen ontdekken	0	4 artikelen alle aanwezig, Sloan, Schubert, lais, Lyketsos
1003	Ackerman	The impact of coexisting depression and timing of psychiatric consultation on medical patients length of stay	1988	case-matched controls	n=92; 54 woman;	not specified	Medical comorbidity	a form of depressive disorder	Depession	no psychiatric disorder	A control group was created by inventing patients whose medical diagnoses matched those of the sutdy group but who had no coexisting pyschiatric condition.	0	depressed group 2.52 days longer than controls (P<0.0001)	The mean length of stay for the study group was 24.84 days, with a SD of 21,61 and a range of two to 98 days. Paired t test revealed a significant difference in the log transformations of the length of stay of the study group and of the predicted LOS of hte control group (t=4,00, df=91, p<.0001); the LOS of the study group was a mean of 2,52 days longer than the predicted LOS of the control group.	x	0	x	0	0	0	0	No	0	1 artikel is aanwezig Fulop
1081	Bressi	The Impact of Psychiatric Comorbidity on General Hospital Length of Stay	2006	data-base research	33% random sample of discharges [N=1,617,710);	0	All medical conditions	patients with schizophrenia (ICD 295), major mood disorders (ICD 296, 300, 311), and substance abuse disorders (ICD 303, 304)	ICD-9 (ICD 290-319)	0	No psychiatric comorbidity	0	Patients with mental illness had lengths of stays that were .33 days [p<.000) longer than those without a mental illness, but after controlling for other predictors the difference was reduced to .15 days [p<.000). Mean LOS 5.19 days in patients with psychiatric comorbidity and 4.86 days in non-psychiatric comorbidity	Patietns with mental illness had lengths of stays that were .33 days longer (p0,000) than those without a metnal illness, after cotnrolling for other predictors the difference was reduced to .15 days (p<000). Patietns with schizophrenia incurred .86 (P.000) days longer on average than patietns without schizophrenia or another mental disorder. Moods disoreders .26 (p.000) longer, substance abuse .…	x	0	x	0	0	0	0	Controlling for age, gender, race, payer type, region, severity of illness, discharge to long term care, hospital bedsize and hospital urban/rural and teaching status.	0	8 artikelen 6 aanwezig, Saravay 1991, 1994, Furlanetto 2003, Fulop 1998 Wancata 2001, Ackerman, NIET AANWEZIG Verbosky 1993, Levenson 1987
1109	Druss	Patterns of Health Care Costs Associated With Depression and Substance	1999	retrospective, cohort study; Costs were calculated as the difference between the mean costs for individuals with the disorder and those without depressive symptoms, major depression, or a substance abuse disorder, controlling for age, sex, race, income, geographic region, insurance status, and self-reported healthstatus.	1994 National Health Interview Survey (NHIS) (14), in which members of 45,705 households in 198 separate U.S. regions were interviewed in their homes; N=77,183 (aged >18 years)	0	All medical conditions	Five mutually exclusive diagnostic categories based on NHIS questions: major depression, depressive symptoms only, substance abuse only, comorbid depression and substance abuse, and no disorder.	Depression & Substance Abuse	no depressive or substance abuse disorder	0	0	x	0	Costs increased significantly (P<0.001) in inpatients with any depression/substance abuse (1033$), depressive symptoms (861$), major depression (1581$), substance abuse only (1244$) and depression with substance abuse (4681$)	TABLE 2. shows inpatient costs	x	0	0	0	0	After the analyses adjsutsed for emographic variables, insurance status and health status people with any depressive or substance abuse disorder had average costs that were 176 dollar highter than people without these conditions	0	GEEN RELEVANTE ARTIKELEN
1110	Haas	Inpatient Costs and Predictors of Costs in the Psychosomatic Treatment of Anorexia Nervosa	2012	cohort study	n=127 anorexia nervosa; The mean age is 26 years. Three percent of the sample are male, 97% are female.	0	0	anorexia nervosa	anorexia nervosa	x	x	na opname	a mean LOS of 28 days	a mean LOS of 28 days	Inpatient costs amounted to 4,647 e/6,831 US$ (Std. 3,714 e/ 5,460 US$) per case.	Inpatient costs amounted to 4,647 e/6,831 US$ (Std. 3,714 e/ 5,460 US$) per case.	x	x	0	0	0	0	0	GEEN RELEVANTE ARTIKELEN
1212	Kartha	Depression is a risk factor for rehospitalisation in medical inpatients	2007	prospective cohort	n=144; mean age 54.8	all diseases	0	major depresion	0	non-rehospitalisation	NO	Na opname	x	0	x	0	depression trippled the odds of beeing rehospitalized	Hospitalized patietns with a history of prior hospitalization within 6 months who screen positive for depression are 3 times more likely to be rehospitalized within 90 days in this realtively high-risk population.	0	Yes	yes	Independent variables, age, LOS, numper of prior admissions, CCI, NSSQ and SF-12.	0	2 aanwezig, Saravay 1996 & Bula 2001, 1 niet aanwezig, Librero 1999
1307	Uldall	Use of Hospital Services by AIDS Patients With Psychiatric Illness	1998	retrospective, cohort study	n=2834 medical or surgical admissions of n=1295 AIDS patients; Medical and surgical admissions of AIDS patients with ICD-9 codes suggesting psychiatric illness (N 5 428) were compared with admissions of AIDS patients without such codes (N 5 2406)	0	aids	psychiatric illness	Dementia, delirium, schizophrenia, pscyhosis, depression, bipolar disorder, anxiety disorder, adjustment disorder, personality disorder, alcohol dependence, drug dependence, alcohol abuse, drug abuse	no psychiatric disorder	without psychiatric illness	0	Admissions of patients with psychiatric morbiditywere hospitalized a median of 9.0 days compared with a median 7.0 days for those without psychiatric diagnoses (t 25.80; df 567.6; p , 0.001).	median length of stay of all admissions was 8 days. Admisions of patients with psychiatric morbidity were hospitalized a median of 9 days compared with a median of 7 days for those without psychiatric diagnoses.	x	0	Time to readmission (in days) for those with psychiatric illness (N 5 190; median 32.0) vs those without (N 5 1349; median 37.0) was not significantly different (t 1.75; df 1537; p . 0.080). There was no significant difference between the two groups regarding whether the readmission was for new or previously treated conditions.	0	0	yes	yes	0	0	2 aanwezig, Uldall 1994 & Ackerman 1988
1369	Hansen	Complexity of care and mental illness in medical inpatients	2001	cohort study	n=147; admitted patients to a general hospital	not described	0	patients with comorbid mental illness	0	patients with no mental illness	0	0	OR for LOS >= 10 days in comorbid mental illness vs non-comorbid mental illness = 0.5 (ns)	Longer hospital stay was associtaed with moderae and severe self-rlated physical disability end with poor and very poor self rated health.	x	X	x	X	0	yes	yes	Gender, age, chronic medical disease, life threatening diseas, severity of medical illness, presence of chornic medical disease	0
1383	Saravay	Psychological Comrobidity and length of stay in the general hospital	1991	prospective cohort	n=278; mean age 48.1±16.2; 54% woman	all diseases	All medical diagnosis	psychiatric illness; measured with MMSE, Zung Depression Inventory, SCL-90	0	no psychiatric diagnosis	without psychiatric illness	0	LOS is significantly longer in patients with psychiatric problems than patients without psychiatric problems	Depression, anxiety, and organicity measured by psychological test were significantly correlated with longer hospital stay.	x	0	x	0	0	0	0	These correlations remained significant after the authors controlled for degree of physical impairment, emergency versus elective admission, and medical versus surgical service, which were themselves correlated with longer hospital stay.	0	2 aanwezig Ackerman 88 en Fulop 87, 2 niet aanwezig Morris, 1990 & Lyons 1986.
1386	Schubert	Impact of the Interaction of Depression and Physical Illness on a Psychiatric Unit’s Length of Stay	1995	retrospective, cohort study	n=532 psychiatric inpatients; mean age 38.9±14.3; 34% male; 74% caucasian	physical illness	all	psychosis, depression, personality disorder, anxiety disorder, adjustment disorder, bipolar disorder, other psychiatric disorders	Psychosis, depression, personality disorder, anxiety disorder, adjusment disorder, bipolar disorder, other disorders	no physical illness	Without physicall illness	na opname	LOS for depressed patients was significantly longer for those with any physical final diagnosis (mean = 20.08 days) than for depressed patients with no physical diagnosis (mean = 7 1.48 days) ; not for other psychiatric disorders	LOS for depressed patients was significantly longer for those with any pysical final diagnosis (mean 20.08 days) than dfor depressed patietns with no physical diagnosis (mean = 11.48 days.) LOS was also longer for all patietns with physical diagnoses (mean = 19.31 days) than all patients with no physical diagnosis (mean = 13.13 days).	x	X	x	X	0	YES	YES	NO	0	7 relevante artikelen, 4 aanwezig, Ackerman 1988, Saravay 1991, Fulop 1987, Fulop 19899. Niet aanwezig 3, Schubert 1992, Levenson 1986, Verbosky 1993
1526	Welch	Depression and Costs of Health Care	2009	cross-sectional study; case-control	n=618,780 patients with insurance claims; The study cohort consisted of 548,062 subjects, with a mean age of 41 years, of whom 53% were women and 47% were men; 14.3% of the study cohort had one or more of the 11 chronic comorbid diseases selected for the study; 3.0% of the study cohort were designated by the study criteria as depressed, of whom 73.8% were women.	11 chronic disease (asthma, back pain, diabetes, epilesy, headach, hypertension, IVDD, obesity, joint pain, CHF, CAD)	11 chronic disease (asthma, back pain, diabetes, epilesy, headach, hypertension, IVDD, obesity, joint pain, CHF, CAD)	depressed	depressed	non-depressed	non-depressed	na opname	x	X	The ratio of cost between non-depressed and depressed patients ranged from 1.5 in obesity to 2.9 in epilepsy. The per-patient difference in non-mental health cost between depressed and non-depressed patients ranged from $1,570 in obesity to $15,240 in CHF. Inpatient cost differences were a significant component only in CAD, epilepsy, and CHF, in which the inpatient cost differences between depres…	The ratio of cost between non-depressed and depressed patients ranged from 1.5 in obesity to 2.9 in epilepsy. The per-patient difference in non-mental health cost between depressed and non-depressed patients ranged from $1,570 in obesity to $15,240 in CHF. Inpatient cost differences were a significant component only in CAD, epilepsy, and CHF, in which the inpatient cost differences between depres…	x	X	0	Yes	Yes	Even when controlling for number of chronic comorbid disease, depressed patietns had significatnly higher costs than non-dperessed patients	0	GEEN RELEVANTE ARTIKELEN
1537	Saravay	Four-Year Follow-Up of the Influence of Psychological Comorbidity on Medical Rehospitalisation	1996	cohort study	n=273 medical/surgical inpatients, aged >17 years	0	all	cognitively impaired	Depression, obsessive compulsive, depression, anxiety, psychoticism, hostility, interpersonal sensitivity.	rest of the group	Non psychological comorbidity	na opname	x	Compared to the rest of the study group, the cognitiveley impaired patients averaged three times as many days rehospitalized at 6-month follow-up, while the patients with high hostility scores had almost twice as many readmissions.	x	X	cognitively impaired twice as many rehospitalisations; hiher interpersonal sensitivity scores had twice as many readmissions	Compared to the rest of the study group, the cognitiveley impaired patients averaged twice as many rehospitalizations.	0	Yes	Yes	These results remained statistically significant after separte partialing out of the effects of severity of functional impairment, age, cofnitive impairement and number of admissions or days spent hospitalized before the index admission	0	2 aanwezig Saravay 1991, 1994 2 niet aanwezig, Levenson 1990 en Schubert 1992
1568	Bourgeois	Cognitive-Disorder Diagnoses in Inpatient Psychosomatic-Medicine Consultations: Associations With Age and Length of Stay	2006	cohort study	n=155 patients with cognitive-disorder	X	all	delirium, dementia, and both	dementia, delirium	hospital population	No	tijdens opname	The overall mean length of stay was 13 days, versus the medical center’s typical length of stay of only 3 days for the year 2001.	See table 5, LOS is significantly longer for patients with dementia, delirium or both.	x	X	x	X	0	Yes	Yes	Yes	0	1 aanwezig Fulop
1601	Bourgeois	The Impact of Psychiatric Diagnosis on Length of Stay in a University Medical Center in the Managed Care Era	2005	cohort study	Data for all patients ages 18 or older discharged during the study period were analyzed. Discharge billing data (which were coded with one primary diagnosis and up to 14 secondary diagnoses) were examined.	X	all	with psychiatric diagnosis: Substance use (9,824 cases), mood disorders (2,524 cases), and cognitive disorders (2,362 cases) were the most common psychiatric illnesses.	Conditions related to substance use, anxiety disorders, cognitive disorders, mood disordres, schizophrenia and other psychotic disorders, adjusment disorder, other psychiatric illnesses	without psychiatric diagnosis	Yes, without psychiatric comorbidity	tijdens opname	The group composed of no psychiatric diagnosis and substanceuse disorders was by far the largest (85% to 87% of the records for each year) and fell at or near the bottom of the average adjusted LOS: 3.29, 3.43, and 3.51 days for 1999, 2000, and 2001, respectively. Adjustment disorders had dramatically greater average adjusted LOS than any other group, i.e., 5.68, 7.96, and 8.85 days, respectively…	The data for the 3 years had much in common. The group composed of no psychiatric diagnosis and substance use disorders was by far the largest (85% to 87% of the records for each year) and fell at or near the bottom of the average adjusted LOS: 3.29, 3.43, and 3.51 days for 1999, 2000, and 2001, respectively. Adjustment disorders had dramatically greater average adjusted LOS than any other group,…	x	X	x	X	0	Yes	Yes	Diagnosis related group (DRG) weight were included in statistical models to compensate for the possibility that an increased LOS in patients with psychiatric illness could be solely due to their being more “medically/surgically ill” than patients without psychiatric illness.	Substance use disorder same LOS as no psychiatric disorder	8 interessant 6 aanwezig, Saravay 1991, Fulop 1998, 1987, Ackermarn 1988, Furlanetto 2003, Saravay 1994, morris 1990, Levenson 1990.
1692	Zatzick	Patients with Recognized Psychiatric Disorders in Trauma Surgery: Incidence, Inpatient Length of Stay, and Cost	2000	cohort study	Trauma surgery patients (n=10,561) admitted; One third of study subjects were women, and 37% of subjects were ethnic minorities. One in four patients was admitted with an intentional injury.	Ten conditions, including diabetes, hypertension, chronic liver disease, ischemic heart disease, degenerative nervous conditions, epilepsy, obesity, and coagulation defects, previously shown to influence the course of recovery among trauma surgery inpatients were included.11 On the basis of discussions with surgical and psychiatric providers, we added HIV infection to this list of medical comorbi…	0	psychiatric diagnosis: alcohol abuse, alcohol dependence, drug abuse, drug dependence, anxiety disorders, bipolar disorders, childhood disorders, delirium, dementia, depression, disorders attributable to organic brain damage, personality disorders, psychoses, stress disorders (i.e., acute stress disorder, adjustment disorders, and PTSD), and other disorders not classified elsewhere.	Alcohol abuse, alcohol dependence, drug abuse, drug dependence, anxiety disorders, bipolar/mania, childhood disorders, delirium, dementia, depression, organic brain syndromes, personality disorders, psychosis, stress disorders, other diagnoses.	without psychiatric diagnosis	0	0	Patients diagnosed with alcohol abuse had an approximately 10% shorter inpatient LOS and 12% lower costs compared with patients without the diagnosis (Table 4). Patients diagnosed with delirium, psychoses, and stress-disorders demonstrated 60% to 103% longer LOS and 46% to 93% higher costs compared with patients without these diagnoses. Patients with drug dependence and organic brain syndromes de…	Patients diagnosed with alcohol abuse had an approximately 10% shorter inpatient LOS and 12% lower costs compared with patients without the diagnosis (Table 4). Patients diagnosed with delirium, psychoses, and stress-disorders demonstrated 60% to 103% longer LOS and 46% to 93% higher costs compared with patients without these diagnoses. Patients with drug dependence and organic brain syndromes de…	See LOS	0	x	X	0	Ja	Ja	Independent variables entered into each regression model include injury type and severity, chornic medical conditions, insurance status, race, age, gender, admission year and each of the 1 psychaitric diagnostic categroies	sterk artikel	3 relevant, 1 aanwezig, Fulop, 2 niet aanwezig, Levenson 1990 en Mojet 1989
1876	Bourgeois	Lagtime in Psychosomatic Medicine Consultations for Cognitive-Disorder Patients: Association With Length of Stay	2009	cohort study	n=157; age 58.2 ±17.7; male (N=89) 57%	hospital population	hospital population	cognitive disorders (primarily dementia and delirium or both)	cognitive disorders (primarily dementia and delirium or both)	non-cognitive disorders	non-cognitive disorders	na opname	The sample cohort’s mean LOS of 18.6 days is over six times greater than that of a typical hospital's LOS (approximately 3 days) for the year studied.	The sample cohort’s mean LOS of 18.6 days is over six times greater than that of a typical hospital's LOS (approximately 3 days) for the year studied.	0	X	0	X	0	Yes	Yes	age and gender meegenomen	0	2 relevant, 1 aanwezig, Ackerman 1988, 1 niet, Lyons 1986
1915	Benzer	One-Year Cost Implications of Using Mental Health Care After Discharge From a General Medical Hospitalization	2012	cohort study	Veterans Health Administration administrative data were drawn from four time periods: one year before admission, an inpatient stay, 30 days postdischarge, and the year after discharge. The cohort included 21,716 patients actively engaged in primary care with and without reliably established mental health diagnoses and who were hospitalized for a general medical issue but had no inpatient utilizat…	no specific diagnosis	0	patients with postdischarge mental health care (n=3,275)	0	no mental health care post-discharge (n=18,441)	no post discharege mental health care	0	Length of stay (days) range: 1–1,143; mean with post-discharge mental health care: 7.86± 21.11; no mental health care post-discharge: 7.21± 15.38	Length of stay (days) range: 1–1,143; mean with post-discharge mental health care: 7.86± 21.11; no mental health care post-discharge: 7.21± 15.38	Total cost ($) mean for patients with mental health care post-discharge: 29,566± 31,577; no mental health care post-discharge: 20,611± 26,855	Total cost ($) mean for patients with mental health care post-discharge: 29,566± 31,577; no mental health care post-discharge: 20,611± 26,855	x	X	not only clinical costst!	0	0	0	0	3 relevant, 2 aanwezig, Koopmans 2005 & Saravay 1994, 1 niet aanwezig Druss1999
2008	Stevens	Delirium in hospital: does it increase length of stay?	1998	cohort study	Of the 47 cases of delirium referred for psychiatric evaluation, five were found to not be delirious and were excluded. The average age for cases was 50 years (range 18-79 years), while for controls the average age was 49 years (range 21-74 years). Fiftyseven per cent each of cases and controls (12 = 24j were male.	0	All	delirious patients	Delirium	non-delirious patients	no delirium	tijdens opname	The median LOS of cases and controls was 20.0 days (range 1-1 17 days) and 8.0 days (range 1-171 days), respectively. The LOS of cases was found to be 2.18-fold longer (95% confidence interval (CI) 1.45-3.27) than that of controls after allowing for severity of illness and the matching variables (f4,, = 3.86; P < 0.001).	The median LOS of cases and controls was 20 days (range 1-117 days) and 8 days (range 1-171 days). Delirious patient LOS was found to be sifnificantly longer (2.2-fold;95% confidence interval 1.5-3.3) than matched controls	x	X	x	X	0	0	0	corrected for severity of illness	0	1 relevant niet aanwezig Levenson 1990
2054	Koenig	Use of health services by hospitalized medically ill depressed elderly patients	1998	case-control cohort study; retrospective	n=542 admitted patients aged >60 years	0	0	depressed patients; diagnosed with CES-D>=16 and HAMD >=11	depressed patients	non-depressed patients	non-depressed patients	na opname	Patients with depressed showed more hopital days past year before the initial admission (12.1±19.8 vs 5.7±12.8; p<0.001); but not in index admission (12.0±13.3 vs 9.2±11.0; P>0.05)	Patients with depressed showed more hopital days before the initial admission (12.1±19.8 vs 5.7±12.8), depressed patients had more hospital days in the past year and had more hosptial days, total inpatients days and outpatinet meidcal visist in the past 3 months than did nondepressed patients.	x	X	x	X	0	0	0	controlling for age, seks, race aducation and severity of medical illness.	0	1 relevant, aanwezig Fulop
2264	Uldall	Psychiatric comorbidity and length of stay in hospitalized AIDS patients	1994	cohort study	n=357 admitted AIDS patients	AIDS	aids	AISd patients with psychiatric disorder	mood disorders, substance use disorders, organic psychaitric disorders, anxiety disorders, and adjustment disorders	AIDS patients without psychiatric disorder	aids patients without psychiatric diagnosis	na opname	mean LOS of AIDS patients with psychiatric disorder was 16.8±15.0 days vs 10.2±19.1 days for AIDS patients without psychiatric disorders (P=0.01)	meant length of stay per hospitalization of aids patients with psychiatric diagnoses was 16.8 days, compared to 10.2 days for aids patients without psychaitric diagnosis (t=-3, df=53,7; P=0,01)	x	X	x	X	0	ja	ja	As shown by table 2, there were no significant differences between the two groups basedon measures of medical morbidity using bonferroni - corrected chi square anlysis.	0	GEEN RELEVANTE ARTIKELEN
2339	Bula	Depressive symptoms as predictor of 6-month outcomes and service utilization in elderly medical inpatients	2001	cohort study	n=401, admitted to internal medicine in academic center	all admissions; primary cardiovascular, pulmonal and falls	cardicovascular disorders, pulmonary disease and falls most frequent.	depressed patients (GDRS>6)	depression	non-depressed (GDRS<=6)	patients without depression	na opname	x	In bivariate analysis depressive symptoms were associated with an increased risk of hospital readmission, nursing home placement and death. After adjustment for demopgraphic, socioeconomic and functional staus and comorbidity, depressive symtoms remained associated with an increased risk of hospital readmission. (adjusted hazard ratio, 1.5; 95% confidence interval, 1.03-2,17 p=0,03)	x	depressive symptoms were associated with increased average costs of both acute and rehabilitation services, resulting in higher overall costs of inpatient services (175.70 vs 126.00 P<0,001) This association remained after adjutsting for differences in functional status, comorbidity and living situation altough it was just short of statistical significant p=0,07	x	X	0	ja	ja	adjustment for dempgraphic, socioeconomic and functional status, comorbidity, depressive symptoms,	0	2 relevant, beide aanwezig, koenig 1998, saravay 1996
2406	FULOP	A Prospective Study of the Impact of Psychiatric Comorbidity on Length of Hospital Stays of Elderly Medical-Surgical Inpatients	1998	cohort study	n=467 admitted patients; age 74.8± 6.9;male: 210 (45%)	0	any	Nearly half the sample had cognitive impairment, or a SCID-R psychiatric diagnosis of depression or anxiety disorder	cognitive impairment, depressive disorders, anxiety disorders	0	ja zonder comorbiditeit	na opname	Psychiatric comorbidity, as a composite variable composed of any cognitive impairment, anxiety, or depression, was associated with a significantly (P=0.023) longer hospital stay by 2.6 days; LOS in any psychiatric disorder: 13.1± 13.0 vs No psychiatric disorder 10.5± 11.7	The patients with cognitive impairment had a significantly prolonged hospital stay comparedwith those without cognitive impairment (14.6 vs 10.6 days). No difference existed in LOS for the patients with and without anxiety disorders (11.6 vs 11.6 days) or depressive disorders (11 vs 8 days).	x	x	x	x	0	ja	ja	nee	check literatuurlijst	4 relevant 3 aanwezig 1 niet, fullop, saravay, saravay, niet aanwezig levenson 1990
2648	ADAMS	A population-based comparison of the use of acute healthcare services by older adults with and without mental illness diagnoses	2015	cohort study	A total of 12 502 older adults were admitted to acute care hospitals/facilities; 8% of older adults in the study (1016/12 283) had mental illness diagnosis during one of their inpatient hospitalizations. The average age of older adults in this cohort was 76.78 years (standard deviation = 7.7) and ranged from 65 to 101 years old.	0	all	mental illness	ICD-10: organic, substance abuse, schizophrenia, mood, neurotic/stress, physiological/physical, personality, MR, unspecified	no mental illness	Patient without mentall illness	0	LOS (days) elderly with mental illness 26.55 (SD = 38.34) vs elderly without mental illness 10.55 (SD = 18.24); P < 0.001	LOS, signficantly longer for patients with MI(16.06 vs 11.5 p < 0,001) in the adjusted model	Cost (Cdn$) in elderly with mental illness $24 076 (SD = 49 319.69) vs elderly without mental illness $10,473 (SD = 17 391.24); P < 0.001	Significantly higher for patients with MI (13274$ vs. 11407$ p <0,001)	Rate of readmission in elderly with mental illness 1.87 (SD = 1.20) vs elderly without mental illness 1.50 (SD = 1.03); P < 0.001	Rate of readmission was significantly higher in patients with MI (1.8 vs 1.5 p <0,05)	0	ja	ja	ja for age, gender, entry code, admit code, readmit code, discharge disposition, rural-urban facility, rural urban residence, mental illness group and CCI)	Alle uitkomstmaten wel ouderen alleen	2 relevante artikelen, 1 aanwezig, bressi, 1 niet aanwezig, sayers2007
2704	McCusker	Does Delirium Increase Hospital Stay?	2003	cohort study	The study sample comprised 359 patients admitted patients: 204 with prevalent delirium, 37 with incident delirium, and 118 without delirium.	0	all	with delirium	delirium	without delirium	no delirium	0	The means±standard deviations for lengths of stay for the 204 prevalent delirium cases and the 136 controls in the control sample without prevalent delirium were 16.2±13.2 days and 12.6±11.8 days, respectively. The medians (and interquartile ranges) of the length of stay in the two groups were 13.0 (7.0–21.0) and 8.0 (5.0–17.0), respectively.	After controlling for covariates, prevalent delirium was not associated with a significantly longer hospital stay, but incident delirium was associted with an excess stay after diagnosis of 7,78 (3,07-12,48)	x	X	x	X	0	0	0	Covariates in these analyses were age seks, marital staus, residence, admitting service, dementia, comorbidity, physciological severity and clinical severity	0	GEEN RELEVANTE ARTIKELEN
2840	EVANS	EFFECT OF MENTAL DISORDERS ON HOSPITAL READMISSION FOR MEDICAL/SURGICAL PATIENTS	1988	cohort study	N = 532; Only 4.9% of the sample were women.This sex bias is typical of a veteran population, but results may not generalize to other populations. Sixty-seven percent were married. Mean age was 60.8 yr. (SD = 12.7).	all admissions	all	mental disorder	psychiatric comorbidity was defined as any of the ICD-9-CM/DSM-3 psychiatric diagnosis codes 290-319	readmitted vs not readmitted	No psychaitric comorbidity	0	x	X	x	X	persons with mental disorders had no significantly different readmission rate from those who were without mental disorder: 21% readmission vs 50% non readmission	Patietns with mental disorders were no more likely to be readmitted within the susequent two months than the group without psychiatric comorbidity	0	0	0	intervening variables were included in the analysis	0	2 relevant, 1 aanwezig Fulop 1987, 1 niet Lyons 1986
2847	Ismail	Associations of medical comorbidity, psychosis, pain, and capacity with psychiatric hospital length of stay in geriatric inpatients with and without dementia	2015	cohort study	169 geriatric patients with dementia were compared with 308 geriatric patients without dementia	0	all	dementia; subgroup psychosis (with or without dementia)	dementia	no dementia; subgroup no-psychosis (with or without dementia)	no dementia	na opname	A diagnosis of dementia did not predict a longer LOS in this geriatric psychiatry inpatient population. The presence of multiple medical co-morbidities had an inverse relationship to length of hospital LOS – a greater number of co-morbidities predicted a shorter hospital LOS in the group of geriatric patients who had dementia compared to the without dementia study group; The geometric mean LOS wa…	A diagnosis of dementia did not predict a longer LOS i nthis geriatric psychaitry inpatient population.	x	x	x	x	0	ja	ja	variables see page 315	0	3 relevant 2 aanwezig Blais 2003, Lyketsos 2002, 1 niet, SARAVAY 2004
2908	Fullop	Impact of psychiatric comorbidity on lenght of hospital stay for medical/surgical patients: a preliminary report	1987	cohort study	n=37370 admitted patients; female 51.7%	all admissions	0	psychiatric comorbidity	0	no psychiatric comorbidity	0	0	LOS (days) 19.9±33.3 in psychiatric comorbidity vs 9.2±15.3 without psychiatric comorbidity	0	x	0	x	0	0	0	0	0	0	1 relevant niet aanwezig Lyons 1986
2911	Creed	Depression and Anxiety Impair Health-Related Quality of Life and Are Associated With Increased Costs in General Medical Inpatients	2002	cohort study	n=263 admitted to a acute medical ward; Seventy-three (27.8%) had depressive/anxiety disorders, 107 were “subthreshold” cases, and 83 were controls.	0	0	depression and anxiety	depression / anxiety	without depression and anxiety	no depression or anxiety	0	The median total length of stay and interquartile range for the index admission and any further admissions during the 5-month follow-up period were cases 9 days (6–20), subthreshold cases 11 days (7–22), and controls 7 days (4– 18). There was no significant difference between these groups after adjustment for severity of physical illness.	X	Depressive and anxiety comorbidity costed $8,541 (SE_x0002_ $605) versus $5,857 (SE _x0002_ $859) in patients without depression and anxiety; P= 0.012	After adjustment for severity of physical illness, using the Duke Severity of illness scal, cases and subthreshold cases incurred greater mean health care costs than controls over the follow-up period: 8541 (SE = 605) versus 5857 (SE = 859( p = 0,012	x	X	0	0	0	gecorrigeeerd for severity of illness	0	2 relevant 2 aanwezig Saravay 1994 & 1996
	Hosaka	Comorbidity of de pression among physically ill patients and its effect on the length of hospital stay	1999	cohort study, retrospective	n=65, age 54.9±15.4; 44 males	malignancy yes/no		major depression		without major depression; without malignancy		na opname	Among those patients withour malignancy, having a depression lengthened the admission: 82.2 vs 36.0 days; with malignancy also depressed patientes stayed much longer (83.8 vs 51.4 days).P<0.05		x		x
	Jiang	Relationship of depression to increased risk of mortality and rehospitalisation in patients with congestive heartfailure	2001	prospective study in heart failure patients during admission after screening for depression	n=374; mean 64±13 years (no depression); 64% males	congestive heart failure		mild or major depression		without depression		na opname	x		x		readmission after 3 mnth: 36.5% (no depression); 42.6% (mild depression); 52.2% (major depression); readmission at 1 year: 52.3 (no depression); 55.6 (mild depression); 80.4 (major depression); regression analyses confirmed negative influence of depression on readmissionrates
	Levenson	Relation of Psychopathology in General Medical Inpatients to use and Cost of Services	1990	cohortstudy	n=455 medical inpatients were screened; 50.4% male; mean age 49.2±16.2 years	not specified (DRG weight)		27.9% very depressed; 27.5% very anxious; 20.2% cognitive impairment; 8.6% high pain levels; total screen "high level of psychopathology" (n=232)		"Low level of psychopathology" (n=223)		na opname	mean LOS in high level patients: 11.5±12.4; in low level 8.7±11.9 (P<0.0007)		high level patients mean cost: 7634±10484 dollar; low level 5643±7411 dollar (P<0.003)		x
	Morris	Impact of Psychiatric Comorbidity on Length of Hospital Stay in Gastroenterology Patients	1990	prospective cohort study	n=110 admitted patients to the gastroenterology ward; mean age 57.2±17.3; 51.9% male	Peptic ulcer (35.5%), paranchymal liver disease (11%), intestinal malignancy (10%), etc		GHQ case		GHQ noncase		na opname	mean LOS in GHQ cases 8.6±5.6 and in GHQ noncases 9.6±6.4 (non significant)		x		x
	Sayers	Psychiatric Comorbidity and Greater Hospitalization Risk, Longer Length of Stay, and Higher Hospitalization Costs in Older Adults with Heart Failure	2007	crosssection claims-based cohort study; multivariate regression analyses performed.	n=21429 >64 years, at least one acute care hospitalisation in 1999	congestive heart failure		alcohol abuse, drug abuse, psychosis, depression, bipolar disorders, anxiety disorders, and other psychiatric conditions					alcohol abuse, psy- choses, major depression, and bipolar disorder were sig- nificant predictors of longer mean LOS after adjusting for the effects of all significant types of medical comorbidity (w2[38] 5 1,383.76, P=0.001);		psychiatric comorbidities, as a group, were associated with higher total hospitalization costs (w2[38] 5 7,294.32, P=0.001). The additional hospitalization costs specifically attributable to each diagnosis, ranged from $1,843.89 to $7,763.47.		x
	Schubert	Increase of Medical Hospital Length of Stay by Depression in stroke and Amputation Patients: A Pilot Study	1992	cohort study	n=17 amputies; n=14 strokes;	Stroke or Amputation		depression, according to the geriatric depression scale		no depression		na opname	stroke: median LOS=39 for amputees median LOS=42; correlation +0.575 (P<0.05) in stroke patients and +0.266 (P>0.05, ns) in amputees		x		x
	Verbosky	The Relationship between Depression and Length of Stay in the General Hospital Patient	1993	cohort study, retrospective	n=48, inpatients for medical and surgical reasons, group in which CL psychiatry was consulted	all kinds of somatic diagnoses		depressed		non depression		na opname	mean LOS of depressed=20 days, of non depressed 10 days(t=2.418; P=0.0239)		x		x
	Mojet	Length of Hospital Stay of Medical and Surgical Inpatients reffered for Psychiatric Consultation: a retrospective study	1989	cohort study, retrospective	n=406 admitted patients seen in CL psychiatry	all kinds of somatic diagnoses		CL consultation		no CL consultation		na opname	mean LOS in CL seen patients was 26.1 and LOS in not seen patients 11.1		x		x
